# Supplementary material for: Thermal Liquid Biopsy (TLB) of Blood Plasma as a Potential Tool to Help in the Early Diagnosis of Multiple Sclerosis
Source: PubMed Central journal article supplement (PMC8069382; doi:10.3390/jpm11040295), 2021-04-13
Supplement: jpm-11-00295-s001.pdf [file jpm-11-00295-s001.pdf]

## Supplementary Information

### Thermal Liquid Biopsy (TLB) of Blood Plasma as a Potential Tool to Help in the Early Diagnosis of Multiple Sclerosis

Ferdinanda Annesi, Sonia Hermoso-Durán, Bruno Rizzuti, Rosalinda Bruno, Domenico Pirritano, Alfredo Petrone, Francesco Del Giudice, Jorge Ojeda, Sonia Vega, Oscar Sanchez-Gracia, Adrian Velazquez-Campoy, Olga Abian and Rita Guzzi

*Table S1. Monovariant analysis of TLB parameters of age groups.*

| Parameter         | <35.00 (n=37)        | 35.00-45.00 (n=19)  | >45.00 (n=29)       | p-value |
|-------------------|----------------------|---------------------|---------------------|---------|
| T <sub>av</sub>   | 68.79 (0.62)         | 68.68 (0.77)        | 68.59 (0.77)        | 0.548   |
| G <sub>1</sub>    | 0.22 (0.14)          | 0.15 (0.12)         | 0.22 (0.14)         | 0.191   |
| AUC <sub>n2</sub> | 36.32 [24.12;144.45] | 40.09 [30.91;84.43] | 50.93 [31.83;80.14] | 0.963   |
| AP <sub>n2</sub>  | 1.80 [0.58;30.79]    | 2.42 [1.29;12.17]   | 3.99 [1.11;9.43]    | 0.975   |
| AUC <sub>n3</sub> | 22.80 [18.13;51.87]  | 25.98 [18.65;35.54] | 21.30 [19.13;26.42] | 0.838   |
| AP <sub>n3</sub>  | 0.76 [0.47;2.83]     | 0.82 [0.53;1.25]    | 0.72 [0.54;0.81]    | 0.890   |
| AUC <sub>n4</sub> | 30.30 [25.62;38.37]  | 30.73 [28.04;35.65] | 31.70 [28.01;40.84] | 0.634   |
| AP <sub>n4</sub>  | 2.56 [2.12;3.72]     | 2.55 [2.01;3.26]    | 2.83 [2.03;4.19]    | 0.885   |
| AUC <sub>n5</sub> | 45.39 [41.06;52.27]  | 44.58 [39.09;51.17] | 46.17 [40.34;50.39] | 0.699   |
| AP <sub>n5</sub>  | 2.56 [2.12;3.72]     | 2.55 [2.01;3.26]    | 2.83 [2.03;4.19]    | 0.885   |
| Dv <sub>2</sub>   | 1.11 [1.00;1.31]     | 1.03 [0.95;1.22]    | 1.06 [0.99;1.14]    | 0.406   |
| Dv <sub>3</sub>   | 1.03 [0.95;1.24]     | 0.98 [0.95;1.15]    | 1.08 [0.99;1.25]    | 0.358   |
| Dv <sub>4</sub>   | 0.72 [0.47;1.09]     | 0.58 [0.31;0.93]    | 0.79 [0.54;1.17]    | 0.373   |
| Dv <sub>5</sub>   | 0.65 [0.53;0.96]     | 0.51 [0.25;0.97]    | 0.65 [0.45;1.05]    | 0.389   |

*Note: average (standard deviation) and median [Q1;Q3] are provided depending on the normality character of the parameter distribution.*

**Table S2.** *Monovariant analysis of TLB parameters of MS group according to EDSS.*

| <b>Parameter</b>  | <b>EDSS=0.50-3.00 (n=32)</b> | <b>EDSS=3.50-7.00 (n=13)</b> | <b>p-value</b> |
|-------------------|------------------------------|------------------------------|----------------|
| T <sub>av</sub>   | 68.48 [68.14;68.93]          | 68.89 [68.69;69.24]          | <b>0.011</b>   |
| G <sub>1</sub>    | 0.19 (0.12)                  | 0.22 (0.17)                  | 0.482          |
| AUC <sub>n2</sub> | 37.82 [26.51;83.50]          | 38.43 [31.96;54.25]          | 0.900          |
| AP <sub>n2</sub>  | 1.74 [0.73;9.96]             | 2.33 [1.35;5.34]             | 0.783          |
| AUC <sub>n3</sub> | 25.19 [21.08;35.56]          | 23.51 [20.01;29.48]          | 0.634          |
| AP <sub>n3</sub>  | 0.76 [0.56;1.20]             | 0.80 [0.63;1.01]             | 0.900          |
| AUC <sub>n4</sub> | 33.46 [28.13;43.78]          | 31.06 [30.17;37.24]          | 0.689          |
| AP <sub>n4</sub>  | 3.19 [1.99;4.23]             | 2.39 [1.71;3.37]             | 0.381          |
| AUC <sub>n5</sub> | 47.53 [41.46;57.26]          | 42.15 [40.34;49.40]          | 0.139          |
| AP <sub>n5</sub>  | 3.19 [1.99;4.23]             | 2.39 [1.71;3.37]             | 0.381          |
| Dv <sub>2</sub>   | 1.06 [0.99;1.14]             | 1.11 [0.99;1.15]             | 0.726          |
| Dv <sub>3</sub>   | 1.04 [0.94;1.10]             | 1.09 [0.94;1.25]             | 0.367          |
| Dv <sub>4</sub>   | 0.76 [0.53;1.42]             | 0.80 [0.41;1.20]             | 0.652          |
| Dv <sub>5</sub>   | 0.62 [0.47;1.01]             | 0.69 [0.47;0.87]             | 0.802          |

**Note:** *Average (standard deviation) and median [Q1;Q3] are provided depending on the normality character of the parameter distribution.*

### Monoparametric descriptive analysis

A monovariant analysis with each single TLB-associated parameter was performed to determine statistically significant differences between HC and MS groups. Previously, a normality test was performed for each parameter, and, therefore, the t-Student test (normal parameter) or the Wilcoxon test (non-normal parameter) was applied.

**Table S3.** Main descriptive indexes for the fourteen TLB-associated parameters.

| <b>HC</b>         | <b>Minimum</b> | <b>Q1</b> | <b>Q2</b> | <b>Average</b> | <b>Q3</b> | <b>Maximum</b> |
|-------------------|----------------|-----------|-----------|----------------|-----------|----------------|
| T <sub>av</sub>   | 67.64          | 68.45     | 68.94     | 68.89          | 69.25     | 70.35          |
| G <sub>1</sub>    | -0.09          | 0.12      | 0.21      | 0.21           | 0.32      | 0.44           |
| AUC <sub>n2</sub> | 16.66          | 25.56     | 66.07     | 135.15         | 159.30    | 927.47         |
| AP <sub>n2</sub>  | 0.10           | 0.84      | 6.06      | 70.79          | 38.46     | 1237.47        |
| AUC <sub>n3</sub> | 14.46          | 17.72     | 20.67     | 73.97          | 46.09     | 444.99         |
| AP <sub>n3</sub>  | 0.36           | 0.48      | 0.61      | 11.92          | 2.08      | 138.76         |
| AUC <sub>n4</sub> | 19.02          | 25.35     | 27.82     | 29.99          | 34.32     | 46.26          |
| AP <sub>n4</sub>  | 0.20           | 0.83      | 1.10      | 1.21           | 1.58      | 3.26           |
| AUC <sub>n5</sub> | 34.18          | 39.90     | 42.42     | 49.10          | 52.32     | 128.17         |
| AP <sub>n5</sub>  | 0.81           | 2.12      | 2.53      | 3.20           | 3.42      | 14.14          |
| Dv <sub>2</sub>   | 0.73           | 0.96      | 1.10      | 1.58           | 1.31      | 16.48          |
| Dv <sub>3</sub>   | 0.36           | 0.98      | 1.07      | 1.73           | 1.36      | 10.65          |
| Dv <sub>4</sub>   | 0.16           | 0.47      | 0.71      | 0.73           | 0.95      | 1.869          |
| Dv <sub>5</sub>   | 0.05           | 0.39      | 0.64      | 0.77           | 0.97      | 3.42           |
| <b>MS</b>         | <b>Minimum</b> | <b>Q1</b> | <b>Q2</b> | <b>Average</b> | <b>Q3</b> | <b>Maximum</b> |
| T <sub>av</sub>   | 66.31          | 68.23     | 68.61     | 68.52          | 68.94     | 69.75          |
| G <sub>1</sub>    | -0.11          | 0.10      | 0.19      | 0.20           | 0.31      | 0.53           |
| AUC <sub>n2</sub> | 17.44          | 27.25     | 38.29     | 87.77          | 70.90     | 666.80         |
| AP <sub>n2</sub>  | 0.22           | 0.77      | 1.80      | 22.25          | 6.82      | 279.56         |
| AUC <sub>n3</sub> | 15.41          | 20.99     | 24.64     | 32.44          | 30.25     | 134.95         |
| AP <sub>n3</sub>  | 0.35           | 0.56      | 0.77      | 1.45           | 1.08      | 13.15          |

|                   |       |       |       |       |       |        |
|-------------------|-------|-------|-------|-------|-------|--------|
| AUC <sub>n4</sub> | 19.72 | 28.33 | 33.31 | 42.86 | 42.66 | 181.42 |
| AP <sub>n4</sub>  | 0.42  | 1.09  | 1.42  | 2.72  | 2.27  | 19.69  |
| AUC <sub>n5</sub> | 26.79 | 40.86 | 47.09 | 52.57 | 51.35 | 175.20 |
| AP <sub>n5</sub>  | 0.43  | 1.87  | 2.87  | 3.90  | 4.19  | 33.43  |
| Dv <sub>2</sub>   | 0.44  | 0.99  | 1.06  | 1.16  | 1.14  | 2.95   |
| Dv <sub>3</sub>   | 0.30  | 0.94  | 1.04  | 1.07  | 1.11  | 1.79   |
| Dv <sub>4</sub>   | 0.06  | 0.49  | 0.79  | 1.73  | 1.38  | 15.22  |
| Dv <sub>5</sub>   | 0.13  | 0.47  | 0.65  | 0.94  | 0.99  | 9.45   |

---

**Table S4.** *Monovariant analysis of TLB parameters of HC and MS groups.*

| <b>Parameter</b>  | <b>HC (n=40)</b>     | <b>MS (n=45)</b>    | <b>p-value</b> |
|-------------------|----------------------|---------------------|----------------|
| T <sub>av</sub>   | 68.89 (0.62)         | 68.52 (0.74)        | <b>0.013</b>   |
| G <sub>1</sub>    | 0.21 (0.14)          | 0.20 (0.14)         | 0.555          |
| AUC <sub>n2</sub> | 66.07 [25.56;159.30] | 38.30 [27.26;70.90] | 0.311          |
| AP <sub>n2</sub>  | 6.06 [0.84;38.46]    | 1.80 [0.77;6.82]    | 0.249          |
| AUC <sub>n3</sub> | 20.67 [17.73;46.09]  | 24.64 [20.99;30.25] | 0.252          |
| AP <sub>n3</sub>  | 0.62 [0.48;2.08]     | 0.77 [0.56;1.08]    | 0.520          |
| AUC <sub>n4</sub> | 27.82 [25.35;34.32]  | 33.31 [28.33;42.66] | <b>0.002</b>   |
| AP <sub>n4</sub>  | 1.11 [0.83;1.58]     | 1.42 [1.09;2.27]    | <b>0.010</b>   |
| AUC <sub>n5</sub> | 42.42 [39.90;52.32]  | 47.09 [40.86;51.35] | 0.423          |
| AP <sub>n5</sub>  | 2.53 [2.12;3.42]     | 2.87 [1.87;4.19]    | 0.549          |
| Dv <sub>2</sub>   | 1.10 [0.96;1.31]     | 1.06 [0.99;1.14]    | 0.438          |
| Dv <sub>3</sub>   | 1.07 [0.98;1.36]     | 1.04 [0.94;1.11]    | 0.098          |
| Dv <sub>4</sub>   | 0.71 [0.47;0.95]     | 0.79 [0.49;1.38]    | 0.208          |
| Dv <sub>5</sub>   | 0.64 [0.39;0.97]     | 0.65 [0.47;1.00]    | 0.888          |

**Note:** *Average (standard deviation) and median [Q1;Q3] are provided depending on the normality character of the parameter distribution.*

**Table S5.** ROC analysis for individual TLB-associated parameters.

| Parameter         | Success Rate | Sensitivity | Specificity | Threshold | Trend |
|-------------------|--------------|-------------|-------------|-----------|-------|
| T <sub>av</sub>   | 37.65%       | 26.67%      | 50.00%      | 68.94     | ↓     |
| G <sub>1</sub>    | 44.71%       | 42.22%      | 47.50%      | 0.20      | ↑     |
| AUC <sub>n2</sub> | 36.47%       | 26.67%      | 47.50%      | 64.45     | ↑     |
| AP <sub>n2</sub>  | 36.47%       | 17.78%      | 57.50%      | 15.92     | ↑     |
| AUC <sub>n3</sub> | 64.71%       | 75.56%      | 52.50%      | 20.90     | ↑     |
| AP <sub>n3</sub>  | 62.35%       | 80.00%      | 42.50%      | 0.53      | ↑     |
| AUC <sub>n4</sub> | 67.06%       | 71.11%      | 62.50%      | 30.05     | ↑     |
| AP <sub>n4</sub>  | 64.71%       | 80.00%      | 47.50%      | 1.06      | ↑     |
| AUC <sub>n5</sub> | 61.18%       | 55.55%      | 67.50%      | 46.15     | ↑     |
| AP <sub>n5</sub>  | 58.82%       | 46.67%      | 72.50%      | 3.20      | ↓     |
| Dv <sub>2</sub>   | 38.82%       | 22.22%      | 57.50%      | 1.16      | ↑     |
| Dv <sub>3</sub>   | 41.18%       | 68.89%      | 10.00%      | 0.95      | ↑     |
| Dv <sub>4</sub>   | 50.59%       | 93.33%      | 2.50%       | 0.17      | ↑     |
| Dv <sub>5</sub>   | 55.29%       | 77.78%      | 30.00%      | 0.44      | ↑     |

**Note:** The Youden method was employed to calculate the threshold, for each individual parameter, for classifying subjects as healthy (negative result, TLB score < 0.5, unaltered TLB thermogram) and diseased (positive result, TLB score > 0.5, altered TLB thermogram). The trend symbol indicates the direction for classification as a healthy subject: ↑↓ means that, in general, subjects classified as healthy (negative result according to TLB) showed values that were larger/smaller than the indicated threshold. The success rate or accuracy is the probability of correctly classifying subjects as healthy (unaltered TLB thermogram and belonging to the HC group) or diseased (altered TLB thermogram and belonging to the MS group).

### Multiparametric predictive/classifying TLB score for Multiple Sclerosis based on GLM

Although some of the individual TLB-associated parameters exhibit good performance regarding subject classification in HC and MS groups, the combined use of several parameters (provided that the two single-parameter preliminary approaches have provided slightly different subsets of relevant parameters) improves the performance of the classification score with the goal of applying TLB in clinical practice. Three models, each using a different set of parameters, were considered. Model 1 was constructed based on  $T_{av}$ ,  $G_1$ ,  $AUC_{ni}$ , and  $AP_{ni}$ ; Model 2 was constructed based on  $Dv_i$ ; and Model 3 considered all 14 parameters.

TLB scores were elaborated applying GLM with the three Models 1-3. Because the  $Dv_i$  parameters are non-linear functions of other individual TLB-associated parameters, establishing whether or not Model 3 represents a significant improvement (compared to Model 1) for predicting a health/disease condition was a required step. After applying GLM to each set of parameters, none of the parameters shows statistical significance (all p-values > 0.05) for discriminating between HC and MS groups (*Table S4*).

**Table S6.** Summary of the application of Binomial Generalized Linear Model with Logistic Regression (GLM) to the three models.

|         | Parameter  | z value | p-value |
|---------|------------|---------|---------|
| Model 1 | $T_{av}$   | -1.08   | 0.279   |
|         | $G_1$      | -0.34   | 0.734   |
|         | $AUC_{n2}$ | -0.13   | 0.899   |
|         | $AP_{n2}$  | -0.21   | 0.837   |
|         | $AUC_{n3}$ | 0.53    | 0.593   |
|         | $AP_{n3}$  | -0.89   | 0.375   |
|         | $AUC_{n4}$ | 1.46    | 0.144   |
|         | $AP_{n4}$  | -0.79   | 0.427   |
|         | $AUC_{n5}$ | 1.16    | 0.247   |
|         | $AP_{n5}$  | -0.69   | 0.488   |
| Model 2 | $Dv_2$     | -0.71   | 0.478   |
|         | $Dv_3$     | -1.49   | 0.135   |
|         | $Dv_4$     | 1.61    | 0.106   |

|         |                   |       |       |
|---------|-------------------|-------|-------|
|         | Dv <sub>5</sub>   | 0.71  | 0.479 |
|         | T <sub>av</sub>   | -0.77 | 0.444 |
|         | G <sub>1</sub>    | -0.32 | 0.752 |
|         | AUC <sub>n2</sub> | 0.92  | 0.358 |
|         | AP <sub>n2</sub>  | -1.01 | 0.310 |
|         | AUC <sub>n3</sub> | 0.28  | 0.778 |
|         | AP <sub>n3</sub>  | -0.34 | 0.731 |
|         | AUC <sub>n4</sub> | 1.34  | 0.179 |
| Model 3 | AP <sub>n4</sub>  | -0.69 | 0.487 |
|         | AUC <sub>n5</sub> | -0.11 | 0.913 |
|         | AP <sub>n5</sub>  | 0.56  | 0.574 |
|         | Dv <sub>2</sub>   | 0.99  | 0.320 |
|         | Dv <sub>3</sub>   | -0.15 | 0.882 |
|         | Dv <sub>4</sub>   | 0.37  | 0.713 |
|         | Dv <sub>5</sub>   | -0.78 | 0.433 |

*Note: A cut-off value of 2.00 for z-value (which approximately corresponds to a two-sided hypothesis test with a significance level of  $\alpha = 0.05$ ) indicates whether the corresponding parameters are statistically meaningful in the model. In other words, if the absolute value of the z-value is larger than 2.00, then its corresponding GLM coefficient is non-negligible, i.e., not null, and the parameter is important and meaningful for the prediction of the presence/absence of MS.*

The model equivalence test, based on the likelihood ratio, shows that Model 1 and 2 can be considered statistically equivalent to Model 3 (Table S5), but Model 3 shows smaller residual deviance.

**Table S7.** Model comparison based on the likelihood ratio test.

|                                      | <b>Model 1</b> | <b>Model 2</b> | <b>Model 3</b> |
|--------------------------------------|----------------|----------------|----------------|
| Degrees of Freedom                   | -4.00          | -10.00         | n.a.           |
| Residual Degrees of Freedom          | 74.00          | 80.00          | 70.00          |
| Residual Deviance                    | 89.26          | 100.38         | 87.89          |
| Equivalency with Model 3 $P(\chi^2)$ | 0.850          | 0.253          | n.a.           |

*n.a.: Not applicable.*

**Table S8.** TLB score (Model 3) vs. gender and age.

|               |          | <b>HC</b> |           |           |                | <b>MS</b> |           |           |           |                |
|---------------|----------|-----------|-----------|-----------|----------------|-----------|-----------|-----------|-----------|----------------|
| <b>Gender</b> | <b>N</b> | <b>Q1</b> | <b>Q2</b> | <b>Q3</b> | <b>p-value</b> | <b>N</b>  | <b>Q1</b> | <b>Q2</b> | <b>Q3</b> | <b>p-value</b> |
| Male          | 19       | 0.14      | 0.31      | 0.51      | 0.224          | 14        | 0.58      | 0.73      | 0.87      | 0.477          |
| Female        | 21       | 0.31      | 0.46      | 0.59      |                | 31        | 0.44      | 0.63      | 0.87      |                |
| <b>Age</b>    | <b>N</b> | <b>Q1</b> | <b>Q2</b> | <b>Q3</b> | <b>p-value</b> | <b>N</b>  | <b>Q1</b> | <b>Q2</b> | <b>Q3</b> | <b>p-value</b> |
| <35           | 22       | 0.22      | 0.31      | 0.49      | 0.757          | 15        | 0.67      | 0.78      | 0.86      | 0.376          |
| 35-45         | 10       | 0.33      | 0.44      | 0.59      |                | 9         | 0.41      | 0.63      | 0.76      |                |
| >45           | 8        | 0.24      | 0.44      | 0.60      |                | 21        | 0.48      | 0.56      | 0.89      |                |

**Note:** *p-values were calculated according to t-Student and ANOVA test in HC group; Wilcoxon test and Kruskal-Wallis test in MS group.*

**Table S9.** TLB score (Model 3) vs. clinical history information (EDSS, diagnosis stage, disease duration and therapy) for MS group.

| <b>EDSS</b>             | <b>N</b> | <b>Q1</b> | <b>Q2</b> | <b>Q3</b> | <b>p-value</b> |
|-------------------------|----------|-----------|-----------|-----------|----------------|
| 0.5-3.0                 | 32       | 0.53      | 0.77      | 0.91      | <b>0.020</b>   |
| 3.5-7.0                 | 13       | 0.41      | 0.49      | 0.63      |                |
| <b>Diagnosis Stage</b>  | <b>N</b> | <b>Q1</b> | <b>Q2</b> | <b>Q3</b> | <b>p-value</b> |
| RRMS                    | 38       | 0.52      | 0.76      | 0.90      | <b>0.009</b>   |
| SPMS                    | 7        | 0.34      | 0.41      | 0.53      |                |
| <b>Disease duration</b> | <b>N</b> | <b>Q1</b> | <b>Q2</b> | <b>Q3</b> | <b>p-value</b> |
| <10 years               | 27       | 0.44      | 0.76      | 0.89      | 0.746          |
| >10 years               | 18       | 0.50      | 0.63      | 0.80      |                |
| <b>Therapy</b>          | <b>N</b> | <b>Q1</b> | <b>Q2</b> | <b>Q3</b> | <b>p-value</b> |
| No                      | 7        | 0.66      | 0.94      | 1.00      | <b>0.028</b>   |
| Yes                     | 38       | 0.44      | 0.63      | 0.82      |                |

**Note:** p-values were calculated according to Wilcoxon test.

**Table S10.** Contingency table for clinical history information (EDSS, diagnosis stage, disease duration and therapy) for MS group (using TLB score from Model 1).

| <b>Group</b>            | <b>EDSS</b>      | <b>TLB score &lt; 0.5</b> | <b>TLB score &gt; 0.5</b> | <b>p-value</b> |
|-------------------------|------------------|---------------------------|---------------------------|----------------|
| MS                      | 0.5-3.0 (n=32)   | 9 (28.12%)                | 23 (71.88%)               | 0.169          |
|                         | 3.5-7.0 (n=13)   | 7 (53.85%)                | 6 (46.15%)                |                |
| <b>Diagnosis</b>        |                  | <b>TLB score &lt; 0.5</b> | <b>TLB score &gt; 0.5</b> | <b>p-value</b> |
| MS                      | RRMS (n=38)      | 11 (28.95%)               | 27 (71.05%)               | 0.079          |
|                         | SPMS (n=7)       | 5 (71.43%)                | 2 (28.57%)                |                |
| <b>Disease duration</b> |                  | <b>TLB score &lt; 0.5</b> | <b>TLB score &gt; 0.5</b> | <b>p-value</b> |
| MS                      | <10 years (n=27) | 9 (33.33%)                | 18 (66.67%)               | 0.758          |
|                         | >10 years (n=18) | 7 (38.89%)                | 11 (61.11%)               |                |
| <b>Therapy</b>          |                  | <b>TLB score &lt; 0.5</b> | <b>TLB score &gt; 0.5</b> | <b>p-value</b> |
| MS                      | No (n=7)         | 1 (14.29%)                | 6 (85.71%)                | 0.393          |
|                         | Yes (n=38)       | 15 (39.47%)               | 23 (60.53%)               |                |

**Note:** p-values were calculated according to Fisher's independence test.

**Table S11.** Contingency table for clinical history information (EDSS, diagnosis stage, disease duration & therapy) for MS group (using TLB score from Model 2).

| <b>Group</b>            | <b>EDSS</b>      | <b>TLB score &lt; 0.5</b> | <b>TLB score &gt; 0.5</b> | <b>p-value</b> |
|-------------------------|------------------|---------------------------|---------------------------|----------------|
| MS                      | 0.5-3.0 (n=32)   | 9 (28.12%)                | 23 (71.88%)               | 0.169          |
|                         | 3.5-7.0 (n=13)   | 7 (53.85%)                | 6 (46.15%)                |                |
| <b>Diagnosis</b>        |                  | <b>TLB score &lt; 0.5</b> | <b>TLB score &gt; 0.5</b> | <b>p-value</b> |
| MS                      | RRMS (n=38)      | 13 (34.21%)               | 25 (65.79%)               | 0.686          |
|                         | SPMS (n=7)       | 3 (42.86%)                | 4 (57.14%)                |                |
| <b>Disease duration</b> |                  | <b>TLB score &lt; 0.5</b> | <b>TLB score &gt; 0.5</b> | <b>p-value</b> |
| MS                      | <10 years (n=27) | 8 (29.63%)                | 19 (70.37%)               | 0.354          |
|                         | >10 years (n=18) | 8 (44.44%)                | 10 (55.56%)               |                |
| <b>Therapy</b>          |                  | <b>TLB score &lt; 0.5</b> | <b>TLB score &gt; 0.5</b> | <b>p-value</b> |
| MS                      | No (n=7)         | 1 (14.29%)                | 6 (85.71%)                | 0.393          |
|                         | Yes (n=38)       | 15 (39.47%)               | 23 (60.53%)               |                |

**Note:** p-values were calculated according to Fisher's independence test.
